# Supplementary material
Source: Elsevier journal article supplement (https://www.sciencedirect.com/science/article/pii/S2253808918301198)
Supplement: mmc2 [file S2253808918301198:mmc2.docx]

| **Actividad del Proceso: VALIDACIÓN** | | |
| --- | --- | --- |
| FALLO | CAUSA | EVENTO ADVERSO |
| Error en la identificación del paciente | Cansancio personal  Presión asistencial | Demora en la asistencia  Retraso en el diagnóstico |
| No aparición del paciente | Error informático  Mala configuración de los filtros | Demora en la asistencia  Retraso en el diagnóstico |
| No información clínica | Peticionario no informado  Presión asistencial | Exploración inadecuada  Demora en la asistencia  Retraso en el diagnóstico |
| No priorización | Peticionario no informado  Presión asistencial | Demora en la asistencia  Retraso en el diagnóstico |
| Error en la prestación | Peticionario no informado | Exploración inadecuada  Demora en la asistencia  Retraso en el diagnóstico |

**ANEXO IV**

| **Actividad del Proceso: CITACIÓN** | | | | |
| --- | --- | --- | --- | --- |
| FALLO | CAUSA | | EVENTO ADVERSO | |
| Pérdida de la petición | Presión asistencial  Desorden Secretaría  Desmotivación  Peticiones no informatizadas | | Demora en la asistencia  Retraso en el diagnóstico | |
| Demora en la citación | Alta demanda  Mala planificación | | Demora en la asistencia  Retraso en el diagnóstico | |
| Error en la identificación del paciente | Presión asistencial  Falta de formación | | Demora en la asistencia  Retraso en el diagnóstico  Sobreexposición a la radiación | |
| Falta de datos del paciente | No los aporta el paciente  Error informático  Error administrativo | | Demora en la asistencia  Retraso en el diagnóstico | |
| Citado para una exploración errónea | Falta formación  Presión asistencial | | Demora en la asistencia  Retraso en el diagnóstico  Sobreexposición a la radiación | |
| Petición anulada sin aviso | Falta formación | | Demora en la asistencia  Retraso en el diagnóstico | |
| **Actividad del Proceso: PRESCRIPCIÓN** | | | | |
| FALLO | CAUSA | | EVENTO ADVERSO | |
| Error en la identificación del paciente | Presión asistencial | | Exploración inadecuada  Demora en la asistencia  Retraso en el diagnóstico | |
| Falta identificación de la patología | Justificación clínica insuficiente  Falta de formación | | Exploración inadecuada  Informe erróneo | |
| Dosis inadecuada | Presión asistencial  Falta de formación  Cansancio del personal | | Exploración inadecuada  Sobreexposición a la radiación  Informe erróneo  Demora en la asistencia  Retraso en el diagnóstico | |
| Radiofármaco incorrecto | Presión asistencial  Falta de formación  Cansancio del personal | | Exploración inadecuada  Sobreexposición a la radiación  Informe erróneo  Demora en la asistencia  Retraso en el diagnóstico | |
| Paciente mal ubicado en la sala | Falta de formación  Error informático | | Demora en la asistencia | |
| No prescripción | Presión asistencial  Falta de formación  Dejadez del personal | | Demora en la asistencia | |
| **Actividad del Proceso: INSTRUCCIONES-PREPARACIÓN** | | | | | |
| FALLO | | CAUSA | | EVENTO ADVERSO | |
| Paciente hiperglucémico | | Mala preparación  Enfermedad no controlable  Omisión por parte del paciente | | Retraso en la exploración  Informe erróneo  Demora en la asistencia  Retraso en el diagnóstico | |
| Sueroterapia inadecuada | | Mala preparación  Falta de información a la planta  Falta de formación  Presión asistencial | | Retraso en la exploración  Informe erróneo  Demora en la asistencia  Retraso en el diagnóstico | |
| Retraso o no llegada del paciente (en ambulancia, de planta o casa) | | Falta de coordinación  Desconocimiento del protocolo  Falta de personal  Presión asistencial  Paciente desconocedor del idioma | | Retraso en la exploración | |
| Paciente con QT o RT reciente | | Falta de información al paciente  Falta de formación | | Retraso en la exploración  Demora en la asistencia  Retraso en el diagnóstico | |
| Falta ayuno | | Mala preparación  Presión asistencial  Falta preparación | | Retraso en la exploración  Informe erróneo  Demora en la asistencia  Retraso en el diagnóstico | |
| Hiperactividad muscular | | Mala preparación  Falta de formación  Presión asistencial  Paciente desconocedor del idioma | | Retraso en la exploración  Informe erróneo  Demora en la asistencia  Retraso en el diagnóstico | |

| **Actividad del Proceso: RECEPCIÓN** | | |
| --- | --- | --- |
| FALLO | CAUSA | EVENTO ADVERSO |
| No explicación de la exploración | Presión asistencial  Falta formación | Disconfort paciente |
| Falta amabilidad | Presión asistencial  Falta formación  Desmotivación | Disconfort paciente |
| No medida de la glucemia | Presión asistencial  Falta formación  Desmotivación | Exploración inadecuada  Sobreexposición a la radiación  Informe erróneo  Demora en la asistencia  Retraso en el diagnóstico |
| Administración inadecuada de insulina | Presión asistencial  Falta formación | Exploración inadecuada  Sobreexposición a la radiación  Informe erróneo  Demora en la asistencia  Retraso en el diagnóstico  Hipoglucemia  Muerte |
| No mantener la vía cuando se administra insulina | Presión asistencial  Falta formación | Hipoglucemia  Muerte |
| Demora en la atención | Presión asistencial  Demora en la llegada del RF  Falta formación | Disconfort paciente  Retraso en la exploración |
| Dificultad en la canalización vía | Falta formación  Venas difíciles | Extravasación del RF  Retraso en la exploración  Disconfort paciente |
| Error en la identificación del paciente | Desconocimiento del protocolo  Presión asistencial | Sobreexposición a la radiación  Demora en la asistencia  Retraso en el diagnóstico |
| Historia de enfermería incompleta o ausente | Presión asistencial  Desmotivación  Falta de formación | Informe erróneo |
| No realizar test de embarazo a mujeres fértiles | Presión asistencial  Desmotivación  Falta de formación | Malformaciones fetales  Aborto |

| **Actividad del Proceso: INYECCIÓN** | | |
| --- | --- | --- |
| FALLO | CAUSA | EVENTO ADVERSO |
| Extravasación del trazador | Falta de formación  Presión asistencial  Material defectuoso | Exploración inadecuada  Sobreexposición a la radiación  Informe erróneo  Demora en la asistencia  Retraso en el diagnóstico |
| Contaminación del paciente | Falta de formación  Presión asistencial  Material defectuoso | Exploración inadecuada  Sobreexposición a la radiación  Informe erróneo  Demora en la asistencia  Retraso en el diagnóstico |
| Retraso en la inyección | Paciente no preparado  Falta de formación  Presión asistencial | Exploración inadecuada |
| Pérdida de la dosis | Caída al suelo de la jeringa | Retraso en la exploración |
| Administración errónea del RF | Falta de formación  Presión asistencial  No comprobación de la etiqueta | Retraso en la exploración  Sobreexposición a la radiación |

| **Actividad del Proceso: EXPLORACIÓN** | | |
| --- | --- | --- |
| FALLO | CAUSA | EVENTO ADVERSO |
| Seleccionar mal al paciente de la lista de trabajo | Falta formación  Presión asistencial | Informe erróneo |
| Elección errónea del protocolo de adquisición | Falta formación  Presión asistencial | Exploración inadecuada  Informe erróneo  Demora en la asistencia  Retraso en el diagnóstico |
| Adquisición errónea del estudio | Mala información al paciente  Paciente no colaborador  Aparición de elementos metálicos no conocidos  Falta formación  Presión asistencial  Disconfort del paciente  Paciente grueso | Exploración inadecuada  Informe erróneo  Demora en la asistencia  Retraso en el diagnóstico  Sobreexposición a la radiación |
| No elección del paciente a través de la lista de trabajo | Fallo informático  Falta de formación | Exploración inadecuada |
| No revisar las imágenes adquiridas al finalizar | Falta formación  Presión asistencial  Despiste | Exploración inadecuada  Informe erróneo  Sobreexposición a la radiación |

| **Actividad del Proceso: RADIOFARMACIA** | | |
| --- | --- | --- |
| FALLO | CAUSA | EVENTO ADVERSO |
| Dispensación errónea del RF | Despiste del personal  Formación inadecuada  Vial mal etiquetado  Falta de protocolo  Presión asistencial | Retraso en la exploración  Sobreexposición a la radiación  Exploración inadecuada  Demora en la asistencia  Retraso en el diagnóstico |
| No disponibilidad del RF | Problemas en la síntesis  Problemas en el transporte | Retraso en la exploración  Demora en la asistencia  Retraso en el diagnóstico |
| Dosis de RF incorrecta | Error en la lectura del activímetro  Defecto en el robot de dispensación | Exploración inadecuada  Sobreexposición a la radiación  Informe erróneo  Demora en la asistencia  Retraso en el diagnóstico |
| Retraso en la dispensación del RF a enfermería | Presión asistencial  Falta de personal  Error informático (CURIO) | Retraso en la exploración  Exploración inadecuada |

| **Actividad del Proceso: MANTENIMIENTO** | | |
| --- | --- | --- |
| FALLO | CAUSA | EVENTO ADVERSO |
| Fuente de calibración caducada | Mala planificación en la renovación | Retraso en las exploración |
| Aumento del número de averías | Mala planificación de los mantenimientos | Demora en la asistencia  Retraso en el diagnóstico |
| Tubo de rayos X mal calibrado | Mala planificación de los mantenimientos | Sobreexposición a la radiación  Exploración inadecuada |

| **Actividad del Proceso: PROCESADO** | | |
| --- | --- | --- |
| FALLO | CAUSA | EVENTO ADVERSO |
| Las imágenes no han llegado a las estaciones de proceso y PACs | Fallo en la red  Error en el protocolo de procesado | Retraso en la elaboración del informe |
| Ausencia de normalización de las imágenes | Falta de formación | Informe erróneo |
| No revisar las imágenes en las tres dimensiones | Falta de formación  Presión asistencial | Informe erróneo |
| No revisar todas las imágenes | Falta de formación  Presión asistencial | Informe erróneo |
| Error en la identificación del paciente | Presión asistencial  Falta de formación  Desmotivación  Despiste | Informe erróneo  Demora en la asistencia  Retraso en el diagnóstico |

| **Actividad del Proceso: INFORME** | | |
| --- | --- | --- |
| FALLO | CAUSA | EVENTO ADVERSO |
| Retraso en la elaboración del informe | Falta de formación  Presión asistencial  Fallo informático | Demora en la asistencia  Retraso en el diagnóstico |
| No visualización del informe en el programa | Fallo informático  Falta de formación (no se ha firmado)  Presión asistencial | Demora en la asistencia  Retraso en el diagnóstico |
| No revisar la historia del paciente | Presión asistencial  Desmotivación | Error en el diagnóstico |
| Informar sobre las imágenes de otro paciente | Presión asistencial  Falta de formación  Desmotivación  Despiste | Error en el diagnóstico |

| **Actividad del Proceso: DESPEDIDA** | | |
| --- | --- | --- |
| FALLO | CAUSA | EVENTO ADVERSO |
| Retraso en despedir al paciente | Presión asistencial  Médico no revisa las imágenes  Despiste | Disconfort del paciente |
| No facilitar un sitio adecuado para vestirse | Presión asistencial  Ausencia de instalación adecuada | Disconfort del paciente |
| Olvido de efectos personales del paciente en la sala | Presión asistencial  Despiste  Falta de formación | Disconfort del paciente |

| **Actividad del Proceso: PROTECCIÓN RADIOLÓGICA** | | |
| --- | --- | --- |
| FALLO | CAUSA | EVENTO ADVERSO |
| Falta de información de las medidas de protección radiológica | Falta de formación  Presión asistencial  Falta de comprensión por parte del paciente | Sobreexposición a la radiación |
