# Supplementary material
Source: Elsevier journal article supplement (https://www.sciencedirect.com/science/article/pii/S2253808918301198)
Supplement: mmc4 [file S2253808918301198:mmc4.docx]

| **Actividad del Proceso: VALIDACIÓN** | | | | | | | |
| --- | --- | --- | --- | --- | --- | --- | --- |
| FALLO | CAUSA | EVENTO ADVERSO | CRÍTICO | GRAVEDAD | FRECUENCIA | DETECTABILIDAD | IPR |
|  |  |  |  |  |  |  |  |
|  |  |  |  |  |  |  |  |
|  |  |  |  |  |  |  |  |
|  |  |  |  |  |  |  |  |
|  |  |  |  |  |  |  |  |
|  |  |  |  |  |  |  |  |
|  |  |  |  |  |  |  |  |
|  |  |  |  |  |  |  |  |

**ANEXO III**
