# Supplementary material
Source: Elsevier journal article supplement (https://www.sciencedirect.com/science/article/pii/S2253808918301198)
Supplement: mmc5 [file S2253808918301198:mmc5.docx]

| **VALIDACIÓN** | | | | | | | |
| --- | --- | --- | --- | --- | --- | --- | --- |
| FALLO | EVENTO ADVERSO | CRÍTICO | | GRAVEDAD | FRECUENCIA | DETECTABILIDAD | IPR | |
| Error en la identificación del paciente | Demora en la asistencia  Retraso en el diagnóstico | X | 8 | | 2 | 1 | 16 | |
| No aparición del paciente | Demora en la asistencia  Retraso en el diagnóstico |  | 6 | | 1 | 1 | 6 | |
| No información clínica | Exploración inadecuada  Demora en la asistencia  Retraso en el diagnóstico |  | 5 | | 4 | 1 | 20 | |
| No priorización | Demora en la asistencia  Retraso en el diagnóstico |  | 5 | | 2 | 5 | 50 | |
| Error en la prestación | Exploración inadecuada  Demora en la asistencia  Retraso en el diagnóstico |  | 6 | | 1 | 1 | 6 | |

**ANEXO V**

| **CITACIÓN** | | | | | | | |
| --- | --- | --- | --- | --- | --- | --- | --- |
| FALLO | EVENTO ADVERSO | CRÍTICO | | GRAVEDAD | FRECUENCIA | DETECTABILIDAD | IPR | |
| Pérdida de la petición | Demora en la asistencia  Retraso en el diagnóstico | X | 8 | | 3 | 8 | 192 | |
| Demora en la citación | Demora en la asistencia  Retraso en el diagnóstico |  | 8 | | 7 | 1 | 56 | |
| Error en la identificación del paciente | Demora en la asistencia  Retraso en el diagnóstico  Sobreexposición a la radiación | X | 8 | | 2 | 2 | 32 | |
| Falta de datos del paciente | Demora en la asistencia  Retraso en el diagnóstico |  | 3 | | 2 | 1 | 6 | |
| Citado para una exploración errónea | Demora en la asistencia  Retraso en el diagnóstico  Sobreexposición a la radiación |  | 4 | | 1 | 1 | 4 | |
| Petición anulada sin aviso | Sobreexposición a la radiación |  | 4 | | 1 | 1 | 4 | |

| **PRESCRIPCIÓN** | | | | | | | |
| --- | --- | --- | --- | --- | --- | --- | --- |
| FALLO | EVENTO ADVERSO | CRÍTICO | | GRAVEDAD | FRECUENCIA | DETECTABILIDAD | IPR | |
| Error en la identificación del paciente | Exploración inadecuada  Demora en la asistencia  Retraso en el diagnóstico | X | 8 | | 1 | 6 | 48 | |
| Falta identificación de la patología | Exploración inadecuada  Informe erróneo  Error diagnóstico |  | 5 | | 8 | 1 | 40 | |
| Dosis inadecuada | Exploración inadecuada  Sobreexposición a la radiación  Informe erróneo  Demora en la asistencia  Retraso en el diagnóstico | X | 8 | | 1 | 2 | 16 | |
| Radiofármaco incorrecto | Exploración inadecuada  Sobreexposición a la radiación  Informe erróneo  Demora en la asistencia  Retraso en el diagnóstico |  | 8 | | 1 | 1 | 8 | |
| Paciente mal ubicado en la sala | Demora en la asistencia |  | 1 | | 1 | 1 | 1 | |
| No prescripción | Demora en la asistencia |  | 1 | | 1 | 1 | 1 | |

| **INTRUCCIONES-PREPARACIÓN** | | | | | | | |
| --- | --- | --- | --- | --- | --- | --- | --- |
| FALLO | EVENTO ADVERSO | CRÍTICO | | GRAVEDAD | FRECUENCIA | DETECTABILIDAD | IPR | |
| Paciente hiperglucémico | Retraso en la exploración  Informe erróneo  Demora en la asistencia  Retraso en el diagnóstico | X | 8 | | 4 | 1 | 32 | |
| Sueroterapia inadecuada | Retraso en la exploración  Informe erróneo  Demora en la asistencia  Retraso en el diagnóstico | X | 8 | | 4 | 1 | 32 | |
| Retraso o no llegada del paciente (en ambulancia, de planta o casa) | Retraso en la exploración |  | 1 | | 7 | 1 | 1 | |
| Paciente con QT o RT reciente | Retraso en la exploración  Demora en la asistencia  Retraso en el diagnóstico  Informe erróneo | X | 8 | | 1 | 1 | 8 | |
| Falta ayuno | Retraso en la exploración  Informe erróneo  Demora en la asistencia  Retraso en el diagnóstico | X | 8 | | 1 | 1 | 8 | |
| Hiperactividad muscular | Retraso en la exploración  Informe erróneo  Demora en la asistencia  Retraso en el diagnóstico |  | 4 | | 1 | 1 | 4 | |

| **RECEPCIÓN** | | | | | | | |
| --- | --- | --- | --- | --- | --- | --- | --- |
| FALLO | EVENTO ADVERSO | CRÍTICO | | GRAVEDAD | FRECUENCIA | DETECTABILIDAD | IPR | |
| No explicación de la exploración | Disconfort paciente |  | 1 | | 1 | 8 | 8 | |
| Falta amabilidad | Disconfort paciente |  | 1 | | 1 | 8 | 8 | |
| No medida de la glucemia | Exploración inadecuada  Sobreexposición a la radiación  Informe erróneo  Demora en la asistencia  Retraso en el diagnóstico | X | 8 | | 1 | 1 | 8 | |
| Administración inadecuada de insulina | Exploración inadecuada  Sobreexposición a la radiación  Informe erróneo  Demora en la asistencia  Retraso en el diagnóstico  Hipoglucemia  Muerte | X | 9 | | 1 | 1 | 9 | |
| No mantener la vía cuando se administra insulina | Hipoglucemia  Muerte | X | 9 | | 1 | 1 | 9 | |
| Demora en la atención | Disconfort paciente  Retraso en la exploración |  | 1 | | 9 | 1 | 9 | |
| Dificultad en la canalización vía | Extravasación del RF  Retraso en la exploración  Disconfort paciente |  | 3 | | 1 | 1 | 3 | |
| Error en la identificación del paciente | Sobreexposición a la radiación  Demora en la asistencia  Retraso en el diagnóstico | X | 8 | | 1 | 3 | 24 | |
| Historia de enfermería incompleta o ausente | Demora en el Informe |  | 4 | | 5 | 1 | 20 | |
| No realizar test de embarazo a mujeres fértiles | Malformaciones fetales  Aborto | X | 9 | | 10 | 1 | 90 | |
|  |  |  |  | |  |  |  | |
| **INYECCIÓN** | | | | | | | |
| FALLO | EVENTO ADVERSO | CRÍTICO | | GRAVEDAD | FRECUENCIA | DETECTABILIDAD | IPR | |
| Extravasación del trazador | Exploración inadecuada  Sobreexposición a la radiación  Informe erróneo  Demora en la asistencia  Retraso en el diagnóstico | X | 8 | | 3 | 1 | 24 | |
| Contaminación del paciente | Exploración inadecuada  Sobreexposición a la radiación  Informe erróneo  Demora en la asistencia  Retraso en el diagnóstico |  | 2 | | 3 | 1 | 6 | |
| Retraso en la inyección | Exploración inadecuada |  | 2 | | 9 | 1 | 18 | |
| Pérdida de dosis | Retraso en la exploración | X | 8 | | 1 | 1 | 8 | |
| Administración errónea del RF | Retraso en la exploración  Sobreexposición a la radiación | X | 8 | | 1 | 1 | 8 | |

| **EXPLORACIÓN** | | | | | | | |
| --- | --- | --- | --- | --- | --- | --- | --- |
| FALLO | EVENTO ADVERSO | CRÍTICO | | GRAVEDAD | FRECUENCIA | DETECTABILIDAD | IPR | |
| Seleccionar mal al paciente de la lista de trabajo | Informe erróneo | X | 8 | | 3 | 3 | 72 | |
| Elección errónea del protocolo de adquisición | Exploración inadecuada  Informe erróneo  Demora en la asistencia  Retraso en el diagnóstico |  | 3 | | 2 | 1 | 6 | |
| Adquisición errónea del estudio | Exploración inadecuada  Informe erróneo  Demora en la asistencia  Retraso en el diagnóstico  Sobreexposición a la radiación |  | 3 | | 5 | 1 | 15 | |
| No elección del paciente a través de la lista de trabajo | Exploración inadecuada |  | 1 | | 1 | 1 | 1 | |
| No revisar las imágenes adquiridas al finalizar | Exploración inadecuada  Informe erróneo  Sobreexposición a la radiación | X | 8 | | 1 | 4 | 32 | |

| **RADIOFARMACIA** | | | | | | | |
| --- | --- | --- | --- | --- | --- | --- | --- |
| FALLO | EVENTO ADVERSO | CRÍTICO | | GRAVEDAD | FRECUENCIA | DETECTABILIDAD | IPR | |
| Dispensación errónea del RF | Demora en la exploración  Sobreexposición a la radiación  Exploración incorrecta  Demora en la asistencia  Retraso en el diagnóstico | X | 5 | | 1 | 1 | 5 | |
| No disponibilidad del RF | Demora en la exploración  Demora en la asistencia  Retraso en el diagnóstico |  | 3 | | 6 | 1 | 18 | |
| Dosis de RF incorrecta | Exploración inadecuada  Sobreexposición a la radiación  Informe erróneo  Demora en la asistencia  Retraso en el diagnóstico |  | 8 | | 1 | 1 | 8 | |
| Retraso en la dispensación del RF a enfermería | Demora en la exploración  Exploración inadecuada |  | 2 | | 3 | 1 | 6 | |

| **MANTENIMIENTO** | | | | | | | |
| --- | --- | --- | --- | --- | --- | --- | --- |
| FALLO | EVENTO ADVERSO | CRÍTICO | | GRAVEDAD | FRECUENCIA | DETECTABILIDAD | IPR | |
| Fuente de calibración caducada | Retraso en las exploraciones |  | 1 | | 6 | 1 | 6 | |
| Aumento del número de averías | Demora en la asistencia  Retraso en el diagnóstico |  | 5 | | 1 | 1 | 5 | |
| Tubo de rayos X mal calibrado | Sobreexposición a la radiación  Exploración de baja calidad | X | 8 | | 1 | 4 | 32 | |

| **PROCESADO** | | | | | | | |
| --- | --- | --- | --- | --- | --- | --- | --- |
| FALLO | EVENTO ADVERSO | CRÍTICO | | GRAVEDAD | FRECUENCIA | DETECTABILIDAD | IPR | |
| Las imágenes no han llegado a las estaciones de proceso y PACs | Retraso en la elaboración del informe |  | 1 | | 2 | 1 | 2 | |
| Ausencia de normalización de las imágenes | Informe erróneo | X | 8 | | 1 | 3 | 24 | |
| No revisar las imágenes en las tres dimensiones | Informe erróneo | X | 8 | | 1 | 3 | 24 | |
| No revisar todas las imágenes | Informe erróneo | X | 8 | | 1 | 3 | 24 | |
| Error en la identificación del paciente | Error en el diagnóstico  Demora en la asistencia  Retraso en el diagnóstico | X | 8 | | 1 | 2 | 16 | |

| **INFORME** | | | | | | | |
| --- | --- | --- | --- | --- | --- | --- | --- |
| FALLO | EVENTO ADVERSO | CRÍTICO | | GRAVEDAD | FRECUENCIA | DETECTABILIDAD | IPR | |
| Retraso en la elaboración del informe | Demora en la asistencia  Retraso en el diagnóstico |  | 3 | | 1 | 1 | 3 | |
| No visualización del informe en el programa | Demora en la asistencia  Retraso en el diagnóstico |  | 1 | | 1 | 4 | 4 | |
| No revisar la historia del paciente | Error en el diagnóstico | X | 8 | | 3 | 7 | 168 | |
| Informar sobre las imágenes de otro paciente | Error en el diagnóstico | X | 8 | | 1 | 2 | 16 | |

| **DESPEDIDA** | | | | | | | |
| --- | --- | --- | --- | --- | --- | --- | --- |
| FALLO | EVENTO ADVERSO | CRÍTICO | | GRAVEDAD | FRECUENCIA | DETECTABILIDAD | IPR | |
| Retraso en despedir al paciente | Disconfort del paciente |  | 1 | | 4 | 3 | 12 | |
| No facilitar un sitio adecuado para vestirse | Disconfort del paciente |  | 1 | | 5 | 1 | 5 | |
| Olvido de efectos personales del paciente en la sala | Disconfort del paciente |  | 1 | | 3 | 1 | 3 | |

| **PROTECCIÓN RADIOLÓGICA** | | | | | | | |
| --- | --- | --- | --- | --- | --- | --- | --- |
| FALLO | EVENTO ADVERSO | CRÍTICO | | GRAVEDAD | FRECUENCIA | DETECTABILIDAD | IPR | |
| Falta de información de las medidas de protección radiológica | Sobreexposición a la radiación |  | 1 | | 2 | 5 | 10 | |
